# Supplementary material for: A rational design strategy for donors in organic solar cells: the conjugated planar molecules possessing anisotropic multibranches and intramolecular charge transfer
Source: Royal Society of Chemistry journal article supplement (doi:10.1039/c1jm11423a), 2011-01-01
Supplement: c1jm11423a.pdf [file c1jm11423a.pdf]

Supporting Information for —

**A Rational Design for Donors in Organic solar cells: The  
Conjugated Planar Molecules Possessing Anisotropic  
Multibranches and Intramolecular Charge Transfer**

Xue Yong and Jingping Zhang\*

*Faculty of Chemistry, Northeast Normal University, Changchun,  
130024, China*

**Table of Contents**

**SI.** Choice of methods

**SII.** The choice of electron-deficient fragments ( $A_{FS}$ )

**SIII.** Optimized geometry for  $B_{F12}-D_F-B_{F22}$

**SIV.** Absorption properties of **X1**, **X2**,  $B_{F12}-D_F-B_{F22}$ , relative X-shaped derivatives  
based on  $A_{F3-6}$ , **PDI8**, and **PDI9**

**SV.** Molecular orbitals for **X1**, **X2**, and  $B_{F12}-D_F-B_{F22}$

**SVI.** Match between the donor and acceptor

**SVII.** Reorganization Energies and Stabilities

**SVIII.** Associated references

## SI. Choice of methods

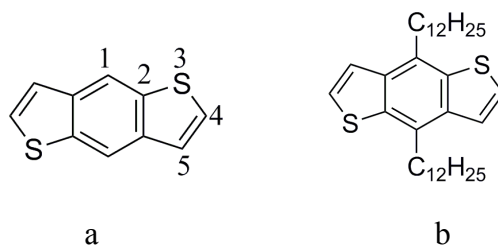

**Scheme S1:** Molecular structure of (a). Benzo[1,2-b':4,5-b]-dithiophene (BDT) (b).  
 4,8-didodecylbenzo[1,2-b':4,5-b]-dithiophene.

**Table S1:** Selected optimized geometrical parameters of BDT by using the PBE0/6-31G(d), B3P86/6-31G(d), and B3LYP/6-31G(d) Methods

|             | PBE0  | B3P86 | B3LYP | Exp <sup>a</sup> |
|-------------|-------|-------|-------|------------------|
| B(1,2)/ Å   | 1.387 | 1.378 | 1.390 | 1.394            |
| B(2,3)/Å    | 1.747 | 1.750 | 1.762 | 1.716            |
| B(3,4)/ Å   | 1.738 | 1.741 | 1.754 | 1.730            |
| A(1,2,3)/ ° | 126.8 | 126.8 | 126.8 | 127.8            |
| A(2,3,4)/ ° | 91.1  | 91.1  | 90.9  | 90.5             |

<sup>a</sup> see Ref. S1

Although a good agreement for C-C bonds length (1.394 Å versus an experimental value of 1.394Å) and angles (126.8°, 90.9° vs. 127.8°, 90.5° of experimental<sup>1</sup> values respectively) can be obtained, the predicted C-S bonds length using B3LYP/6-31G(d) are found to deviate from their experimental values by about 0.46 and 0.24 Å. The PBE0 and B3P86 provide consistent results, while the results from the PBE0 agree better with the experimental dates (the observed deviation is less than 0.031 Å in bond length and less than 1° in bond angles).

**Table S2:** Calculated excitation energies ( $E_v$ ), wavelength ( $\lambda_{ab}$ ), and oscillator strength ( $f$ ) of 4,8-didodecylbenzo[1,2-b':4,5-b]-dithiophene calculated by Various Methods.

| Method            | $E_v^a$ (eV) | $\lambda_{ab}$ (nm) | $f$   |
|-------------------|--------------|---------------------|-------|
| TD-PBE0/6-31G(d)  | 3.56         | 349                 | 0.129 |
| TD-B3LYP/6-31G(d) | 3.43         | 361                 | 0.114 |
| TD-B3P86/6-31G(d) | 3.92         | 316                 | 0.176 |
| exp <sup>b</sup>  |              | 347                 |       |

<sup>a</sup> the first lowest excitation energies, <sup>b</sup> see Ref. S2

From Table S2, while the calculated the maximum absorption wavelength was overestimated by about 14 nm using the TD-B3LYP/6-31G(d) but underestimated by about 31 nm with the TD-B3P86/6-31G(d), respectively, the TD-PBE0/6-31G(d) yields the most accurate result (349 vs. 347 nm of experiment value).<sup>2</sup>

### SII. The choice of electron-deficient fragments ( $A_{FS}$ )

**Table S3** Calculated energy data of the frontier molecular orbitals of BDT,  $B_{F1_2-D_F-B_{F2_2}}$ , and the 6  $A_{FS}$  ( $A_{F1}$ - $A_{F6}$ ) ( $E_{HOMO}$ = HOMO energy levels;  $E_{LUMO}$ = LUMO energy levels; and  $E_g = E_{LUMO} - E_{HOMO}$ )

| Molecules               | $E_{HOMO}$ | $E_{LUMO}$ | $E_g$ (eV) | Molecules | $E_{HOMO}$ | $E_{LUMO}$ | $E_g$ (eV) |
|-------------------------|------------|------------|------------|-----------|------------|------------|------------|
| BDT                     | -5.92      | -1.10      | 4.82       | $A_{F3}$  | -7.37      | -2.68      | 4.69       |
| $B_{F1_2-D_F-B_{F2_2}}$ | -5.05      | -2.40      | 2.65       | $A_{F4}$  | -7.71      | -2.58      | 5.12       |
| $A_{F1}$                | -7.83      | -3.39      | 4.44       | $A_{F5}$  | -6.91      | -2.20      | 4.71       |
| $A_{F2}$                | -7.85      | -3.37      | 4.48       | $A_{F6}$  | -7.92      | -1.40      | 6.52       |

### SIII. Optimized geometry for $B_{F1_2-D_F-B_{F2_2}}$

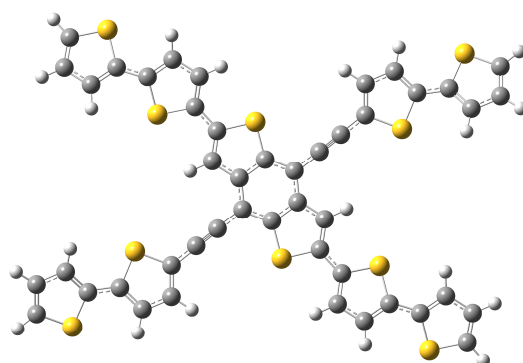

**Fig. S1** The stereograph of optimized structures of the X-shaped  $B_{F1_2-D_F-B_{F2_2}}$ . (C, S, and H are shown in gray, yellow, and white, respectively)

**SIV.** Absorption properties for **X1**, **X2**, **B<sub>F</sub>1<sub>2</sub>-D<sub>F</sub>-B<sub>F</sub>2<sub>2</sub>**, relative X-shaped derivatives based on A<sub>F</sub>3-6, **PDI8**, and **PDI9**.

**Table S4** Calculated excitation energies ( $E_v$ ), wavelength ( $\lambda_{ab}$ ), oscillator strength ( $f$ ), and composition in terms of molecular orbitals with related character (H = HOMO, L = LUMO) for **X1**, **X2**, **PDI8**, and **PDI9**.

|             | Transition | $E_v$ (eV) | $\lambda_{ab}$ (nm)   | $f$   | Assignments                                            |
|-------------|------------|------------|-----------------------|-------|--------------------------------------------------------|
| <b>X1</b>   | S0→S1      | 1.67       | 732                   | 0.966 | H→L (0.96)(ICT)                                        |
|             | S0→S2      | 1.79       | 694                   | 0.949 | H→L+1(0.97)(ICT)                                       |
|             | S0→S5      | 2.05       | 605                   | 1.693 | H-1→L(0.87)(ICT)                                       |
|             | S0→S6      | 2.15       | 577                   | 0.464 | H-1→L+1(0.77)(ICT)                                     |
|             | S0→S10     | 2.31       | 536                   | 0.529 | H-2→L+2 (0.30)(ICT)<br>H→L+4 (0.52)( $\pi$ - $\pi^*$ ) |
|             | S0→S13     | 2.38       | 521                   | 0.143 | H-2→L+3 (0.91)(ICT)                                    |
|             | S0→S16     | 2.57       | 483                   | 0.255 | H-3→L+2 (0.89)(ICT)                                    |
|             | S0→S19     | 2.78       | 446                   | 1.295 | H→L+5(0.76)( $\pi$ - $\pi^*$ )                         |
|             | S0→S21     | 2.80       | 443                   | 0.135 | H-4→L(0.83)( $\pi$ - $\pi^*$ )                         |
|             | S0→S29     | 3.18       | 389                   | 0.327 | H-1→L+5(0.89)( $\pi$ - $\pi^*$ )                       |
| <b>X2</b>   | S0→S1      | 1.71       | 725                   | 1.142 | H→L(0.96)(ICT)                                         |
|             | S0→S2      | 1.84       | 675                   | 1.203 | H→L+1 (0.98)(ICT)                                      |
|             | S0→S5      | 2.07       | 598                   | 2.052 | H-1→L(0.90)(ICT)                                       |
|             | S0→S7      | 2.20       | 562                   | 0.496 | H-1→L+1(0.81)(ICT)                                     |
|             | S0→S10     | 2.39       | 519                   | 0.426 | H-2→L+2(0.41)(ICT)<br>H→L+4(0.41)( $\pi$ - $\pi^*$ )   |
|             | S0→S12     | 2.46       | 505                   | 0.240 | H-2→L+3(0.88)(ICT)                                     |
|             | S0→S16     | 2.65       | 470                   | 0.430 | H-3→L+2(0.86)(ICT)                                     |
|             | S0→S18     | 2.74       | 453                   | 0.154 | H-1→L+4(0.83)( $\pi$ - $\pi^*$ )                       |
|             | S0→S20     | 2.87       | 432                   | 0.914 | H→L+5(0.76)( $\pi$ - $\pi^*$ )                         |
|             | S0→S29     | 3.27       | 379                   | 0.268 | H-1→L+5(0.82)( $\pi$ - $\pi^*$ )                       |
| <b>PDI8</b> | S0→S1      | 2.14       | 514(522) <sup>a</sup> | 0.665 | H→L ( $\pi$ - $\pi^*$ )                                |
|             | S0→S15     | 4.46       | 278                   | 0.330 | H→L+4(0.77)( $\pi$ - $\pi^*$ )                         |
| <b>PDI9</b> | S0→S1      | 2.44       | 509                   | 0.689 | H→L ( $\pi$ - $\pi^*$ )                                |

<sup>a</sup>see Ref. S3

**Table S5** Calculated excitation energies ( $E_v$ ), wavelength ( $\lambda_{ab}$ ), oscillator strength ( $f$ ), and composition in terms of molecular orbitals with related character (H = HOMO, L = LUMO) for relative X-shaped derivatives based on A<sub>F</sub>3-6, i.e., 1-(A<sub>F</sub>3-B<sub>F</sub>1)<sub>2</sub>-D<sub>F</sub>-(B<sub>F</sub>2-A<sub>F</sub>3)<sub>2</sub>, 2-(A<sub>F</sub>3-B<sub>F</sub>1)<sub>2</sub>-D<sub>F</sub>-(B<sub>F</sub>2-A<sub>F</sub>3)<sub>2</sub>, (A<sub>F</sub>4-B<sub>F</sub>1)<sub>2</sub>-D<sub>F</sub>-(B<sub>F</sub>2-A<sub>F</sub>4)<sub>2</sub>, (A<sub>F</sub>5-B<sub>F</sub>1)<sub>2</sub>-D<sub>F</sub>-(B<sub>F</sub>2-A<sub>F</sub>5)<sub>2</sub>, and (A<sub>F</sub>6-B<sub>F</sub>1)<sub>2</sub>-D<sub>F</sub>-(B<sub>F</sub>2-A<sub>F</sub>6)<sub>2</sub>

|                                                                                                                      | Transition | $E_v$<br>(eV) | $\lambda_{ab}$<br>(nm) | $f$   | Assignments   |
|----------------------------------------------------------------------------------------------------------------------|------------|---------------|------------------------|-------|---------------|
| 1-(A <sub>F</sub> 3-B <sub>F</sub> 1) <sub>2</sub> -D <sub>F</sub> -(B <sub>F</sub> 2-A <sub>F</sub> 3) <sub>2</sub> | S0→S1      | 1.85          | 669                    | 1.283 | H→L (0.95)    |
|                                                                                                                      | S0→S2      | 2.01          | 617                    | 1.223 | H→L (0.95)    |
|                                                                                                                      | S0→S16     | 2.88          | 430                    | 0.685 | H→L+5 (0.67)  |
| 2-(A <sub>F</sub> 3-B <sub>F</sub> 1) <sub>2</sub> -D <sub>F</sub> -(B <sub>F</sub> 2-A <sub>F</sub> 3) <sub>2</sub> | S0→S1      | 1.88          | 657                    | 1.012 | H→L (0.93)    |
|                                                                                                                      | S0→S3      | 2.01          | 615                    | 0.936 | H→L+2 (0.94)  |
|                                                                                                                      | S0→S5      | 2.23          | 556                    | 1.502 | H-1→L (0.83)  |
|                                                                                                                      | S0→S16     | 2.77          | 448                    | 0.981 | H-3→L+1(0.55) |
| (A <sub>F</sub> 4-B <sub>F</sub> 1) <sub>2</sub> -D <sub>F</sub> -(B <sub>F</sub> 2-A <sub>F</sub> 4) <sub>2</sub>   | S0→S1      | 1.96          | 633                    | 1.283 | H→L (0.95)    |
|                                                                                                                      | S0→S2      | 2.19          | 566                    | 1.456 | H→L (0.95)    |
|                                                                                                                      | S0→S16     | 2.31          | 536                    | 1.933 | H-1→L (0.91)  |
| (A <sub>F</sub> 5-B <sub>F</sub> 1) <sub>2</sub> -D <sub>F</sub> -(B <sub>F</sub> 2-A <sub>F</sub> 5) <sub>2</sub>   | S0→S1      | 1.98          | 624                    | 1.335 | H→L (0.94)    |
|                                                                                                                      | S0→S2      | 2.21          | 560                    | 1.771 | H→L+1 (0.88)  |
|                                                                                                                      | S0→S16     | 2.87          | 432                    | 1.220 | H→L+5 (0.64)  |
| (A <sub>F</sub> 6-B <sub>F</sub> 1) <sub>2</sub> -D <sub>F</sub> -(B <sub>F</sub> 2-A <sub>F</sub> 6) <sub>2</sub>   | S0→S1      | 2.12          | 586                    | 1.415 | H→L (0.97)    |
|                                                                                                                      | S0→S15     | 3.37          | 368                    | 0.608 | H-2→L+3(0.72) |

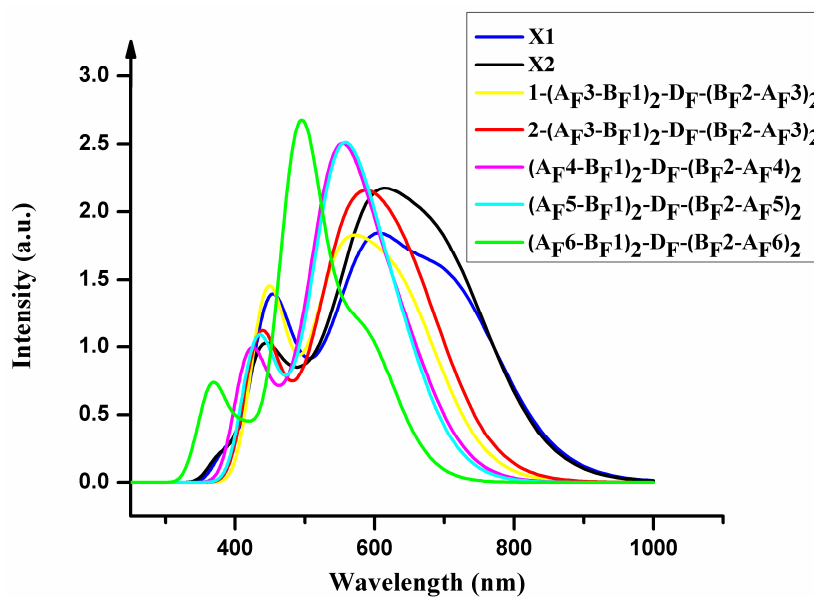

(a)

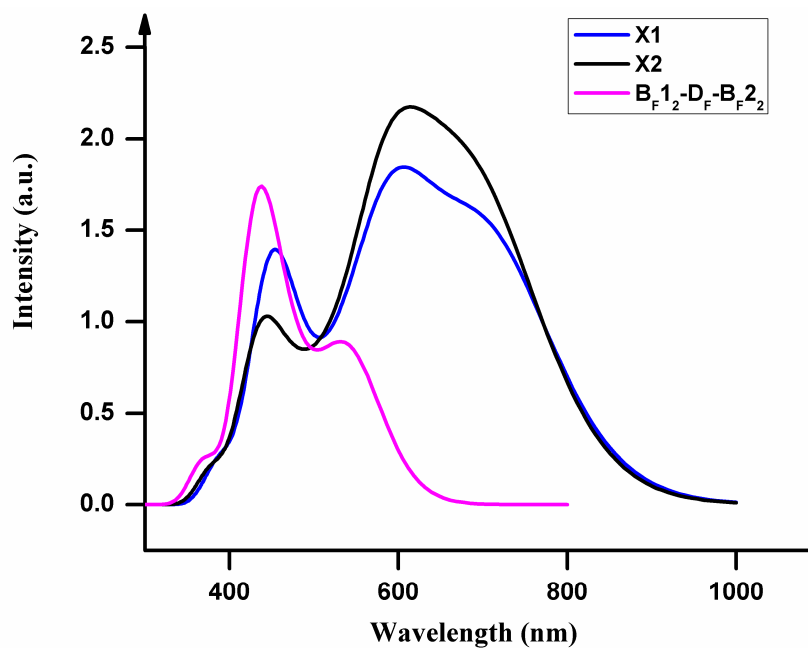

(b)

**Fig. S2** (a) Simulated absorption spectra of 1-(AF<sub>3</sub>-BF<sub>1</sub>)<sub>2</sub>-D<sub>F</sub>-(BF<sub>2</sub>-AF<sub>3</sub>)<sub>2</sub>, 2-(AF<sub>3</sub>-BF<sub>1</sub>)<sub>2</sub>-D<sub>F</sub>-(BF<sub>2</sub>-AF<sub>3</sub>)<sub>2</sub>, (AF<sub>4</sub>-BF<sub>1</sub>)<sub>2</sub>-D<sub>F</sub>-(BF<sub>2</sub>-AF<sub>4</sub>)<sub>2</sub>, (AF<sub>5</sub>-BF<sub>1</sub>)<sub>2</sub>-D<sub>F</sub>-(BF<sub>2</sub>-AF<sub>5</sub>)<sub>2</sub>, and (AF<sub>6</sub>-BF<sub>1</sub>)<sub>2</sub>-D<sub>F</sub>-(BF<sub>2</sub>-AF<sub>6</sub>)<sub>2</sub>; and (b) Simulated absorption spectra of **X1**, **X2**, and **BF<sub>12</sub>-D<sub>F</sub>-BF<sub>22</sub>** at the TD-PBE0/6-31G(d) level.

**Fig. S2a** shows that the absorption spectra of **X1** and **X2** display two wider and stronger band in the whole visible and near-infrared region of the solar spectrum, whereas all the seven derivatives exhibit similar. The order of the excitation energy

obtained at the TD-PBE0/6-31G(d) level is  $\mathbf{X1} < \mathbf{X2} < 1-(\text{AF}_3\text{-BF}_1)_2\text{-DF-(BF}_2\text{-AF}_3)_2 < 2-(\text{AF}_3\text{-BF}_1)_2\text{-DF-(BF}_2\text{-AF}_3)_2 < (\text{AF}_4\text{-BF}_1)_2\text{-DF-(BF}_2\text{-AF}_4)_2 < (\text{AF}_5\text{-BF}_1)_2\text{-DF-(BF}_2\text{-AF}_5)_2 < (\text{AF}_6\text{-BF}_1)_2\text{-DF-(BF}_2\text{-AF}_6)_2$  ( $1.67 < 1.71 < 1.85 < 1.88 < 1.96 < 1.98 < 2.12$  eV). Hence, the excitation energy increases along with the decrease of the electron-withdrawing strength of the electron-accepting units. Therefore, both  $\mathbf{X1}$  and  $\mathbf{X2}$  exhibit superior absorption properties when compared with the other derivatives.

**SV. Molecular orbitals for  $\mathbf{X1}$ ,  $\mathbf{X2}$ , and  $\mathbf{BF}_1\mathbf{2-DF-BF}_2\mathbf{2}$ .**

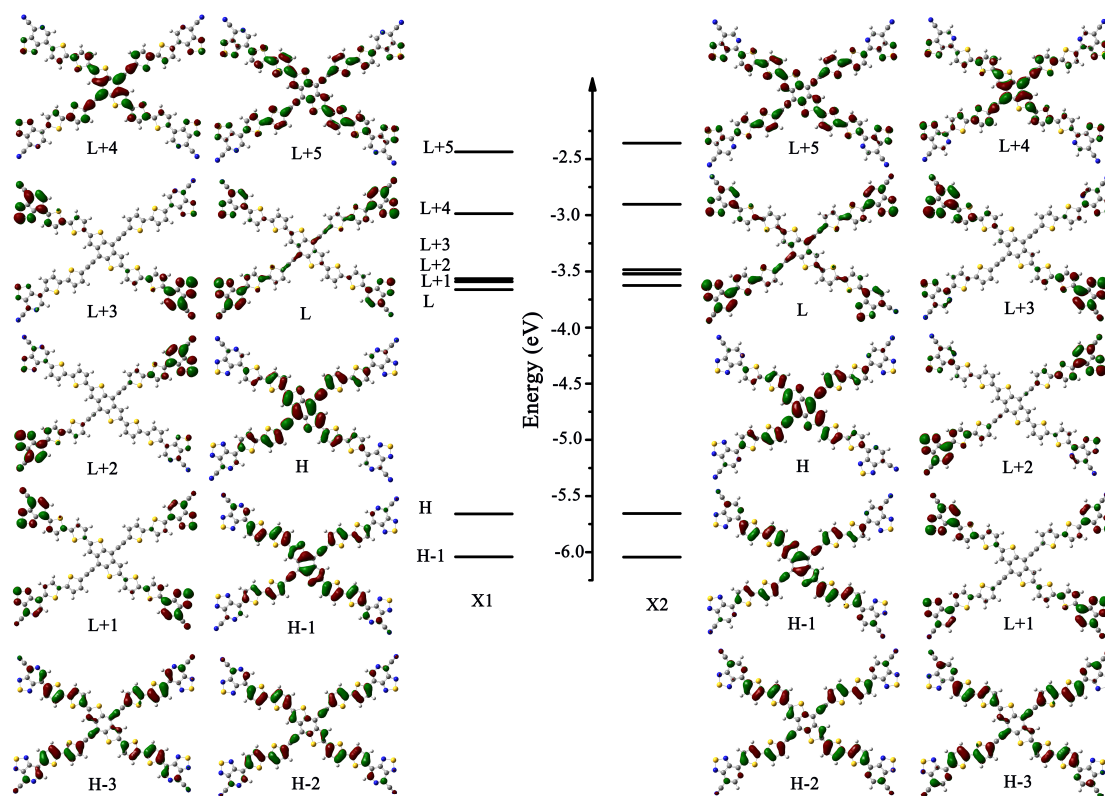

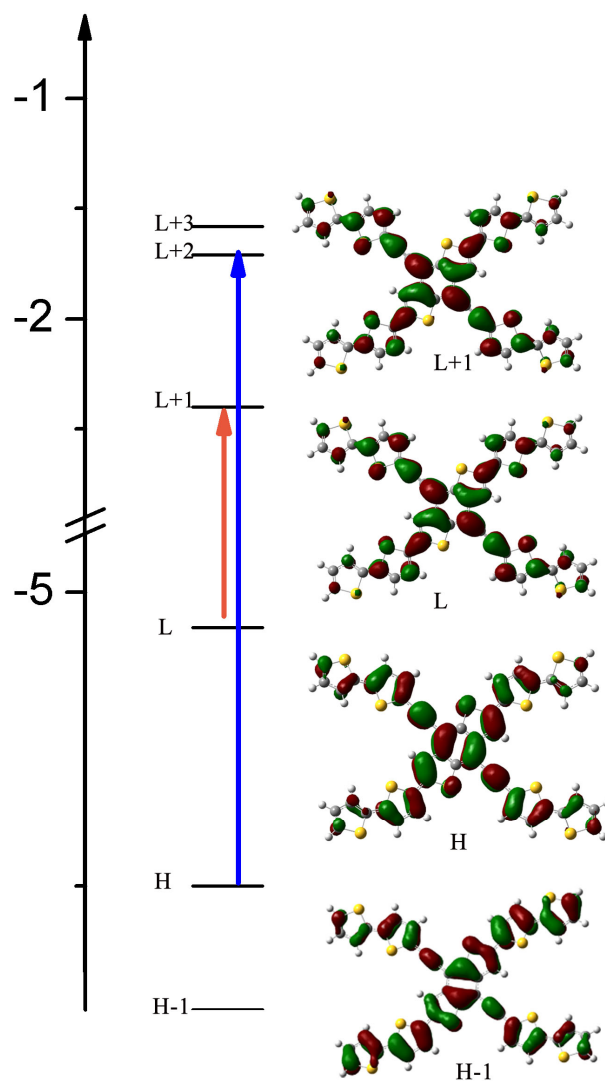

**Fig. S3** Electron density plots of the FMOs of X1, X2, and BF<sub>12</sub>-D<sub>F</sub>-BF<sub>2</sub><sub>2</sub> obtained by the PBE0/6-31G(d) method. (H = HOMO, L = LUMO). Arrow indicates main configuration of the strongest electronic excitations.



**Table S6** Molecular orbital compositions (in percentage) of **X1** and **X2** ( $D_F$  = electron-rich fragment,  $B_{F1}$  =  $\pi$ -bridge1,  $B_{F2}$  =  $\pi$ -bridge2, and  $A_F$  = electron-deficient fragment)

|           |     | $D_F$ | $B_{F2}$ | $B_{F1}$ | $A_F$ |
|-----------|-----|-------|----------|----------|-------|
| <b>X1</b> | L+5 | 16    | 32       | 32       | 20    |
|           | L+4 | 30    | 32       | 17       | 21    |
|           | L+3 | 1     | 2        | 12       | 84    |
|           | L+2 | 1     | 14       | 2        | 83    |
|           | L+1 | 1     | 16       | 11       | 83    |
|           | L   | 5     | 15       | 7        | 73    |
|           | H   | 36    | 38       | 19       | 7     |
|           | H-1 | 20    | 27       | 40       | 13    |
|           | H-2 | 17    | 8        | 36       | 17    |
|           | H-3 | 23    | 34       | 41       | 31    |
| <b>X2</b> | L+5 | 17    | 30       | 30       | 23    |
|           | L+4 | 29    | 29       | 16       | 26    |
|           | L+3 | 2     | 5        | 16       | 77    |
|           | L+2 | 1     | 18       | 5        | 76    |
|           | L+1 | 2     | 9        | 14       | 75    |
|           | L   | 7     | 20       | 10       | 63    |
|           | H   | 36    | 38       | 19       | 7     |
|           | H-1 | 21    | 26       | 40       | 13    |
|           | H-2 | 38    | 9        | 36       | 17    |
|           | H-3 | 30    | 5        | 41       | 24    |

## SVI. Match between the donor and acceptor

**Table S7** Calculated energy data of the frontier molecular orbitals of **X1**, **X2**, and potential PDIs acceptors ( $E_{\text{HOMO}}$ = HOMO energy levels;  $E_{\text{LUMO}}$ = LUMO energy levels; and  $E_{\text{g}} = E_{\text{LUMO}} - E_{\text{HOMO}}$ )

| Molecules   | $E_{\text{HOMO}}$ | $E_{\text{LUMO}}$         | $E_{\text{g}}$ (eV) | Molecules   | $E_{\text{HOMO}}$ | $E_{\text{LUMO}}$ | $E_{\text{g}}$ (eV) |
|-------------|-------------------|---------------------------|---------------------|-------------|-------------------|-------------------|---------------------|
| <b>X1</b>   | -5.66             | -3.66                     | 2.00                | <b>PDI5</b> | -6.81             | -4.05             | 2.76                |
| <b>X2</b>   | -5.65             | -3.63                     | 2.02                | <b>PDI6</b> | -6.78             | -4.02             | 2.76                |
| <b>PDI1</b> | -6.75             | -4.00                     | 2.75                | <b>PDI7</b> | -6.82             | -4.03             | 2.79                |
| <b>PDI2</b> | -6.81(-6.04)      | -4.02(-4.07) <sup>a</sup> | 2.79                | <b>PDI8</b> | -6.69             | -3.94             | 2.75                |
| <b>PDI3</b> | -6.84             | -4.08                     | 2.76                | <b>PDI9</b> | -6.76             | -3.97             | 2.79                |
| <b>PDI4</b> | -6.82             | -4.06                     | 2.76                |             |                   |                   |                     |

<sup>a</sup> see Ref. S4

## SVII. Reorganization Energies and Stabilities

**Table S8** Reorganization energies ( $\lambda_{\text{e}}/\lambda_{\text{h}}$  for electron/hole) for **X1**, **X2**, **PDI8**, and **PDI9**.

|                           | <b>X1</b> | <b>X2</b> | <b>PDI8</b> | <b>PDI9</b> | TPD                | Alq <sub>3</sub>   |
|---------------------------|-----------|-----------|-------------|-------------|--------------------|--------------------|
| $\lambda_{\text{h}}$ (eV) | 0.119     | 0.114     | 0.156       | 0.175       | 0.290 <sup>a</sup> |                    |
| $\lambda_{\text{e}}$ (eV) | 0.062     | 0.056     | 0.257       | 0.263       |                    | 0.276 <sup>b</sup> |

<sup>a</sup> see Ref. S5; <sup>b</sup> see Ref. S6

The calculated results provide  $\lambda_{\text{h}}$  values of 0.119 for **X1**, 0.114 for **X2**, 0.156 for **PDI8**, and 0.175 eV for **PDI9**;  $\lambda_{\text{e}}$  values of 0.062 for **X1**, 0.056 for **X2**, 0.257 for **PDI8**, and 0.263 eV for **PDI9**.

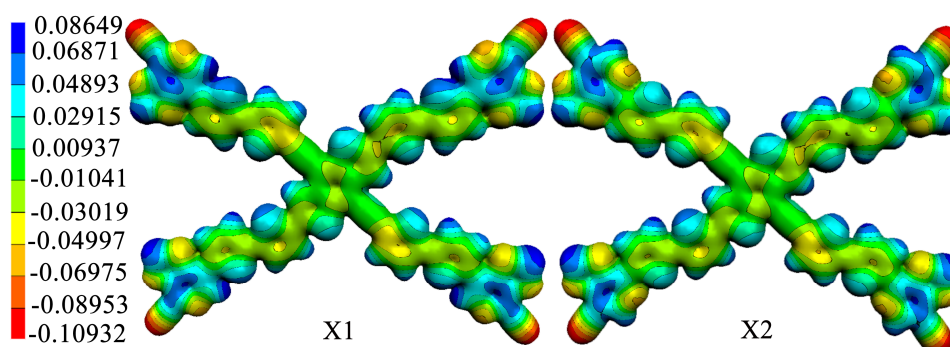

**Fig. S4** Electrostatic surface potential (MEP) for **X1** and **X2**. Regions of higher electron density are shown in red and of lower electronic density in blue.

### SVIII. Associated references

- S1. K. Takimiya, Y. Konda, H. Ebata, N. Niihara and T. Otsubo, *J. Org. Chem.*, 2005, **70**, 10569.
- S2. H. Pan, Y. Li, Y. Wu, P. Liu, B. S. Ong, S. Zhu and G. Xu, *Chem. Mater.*, 2006, **18**, 3237.
- S3. B. A. Jones, A. Facchetti, M. R. Wasielewski and T. J. Marks, *Adv. Fun. Mater.*, 2008, **18**, 1329.
- S4. W. S. Shin, H.-H. Jeong, M.-K. Kim, S.-H. Jin, M.-R. Kim, J.-K. Lee, J. W. Lee and Y.-S. Gal, *J. Mater. Chem.*, 2006, **16**, 384.
- S5. M. Malagoli and J. L. Breas, *Chem. Phys. Lett.*, 2000, **327**, 13.
- S6. B. C. Lin, C. P. Cheng, Z.-Q. You and C.-P. Hsu, *J. Am. Chem. Soc.*, 2004, **127**, 66.
